# Supplementary material
Source: PubMed Central journal article supplement (PMC3061992)
Supplement: ejhg2010187x4.pdf [file ejhg2010187x4.pdf]

EHJvRoon\_Methylation of a CTCF-binding site in PTPRG\_Supplementary table 2

| ID   | Tissue location  | Type       | Mutation | Sex | Age | PTPRG MLPA |
|------|------------------|------------|----------|-----|-----|------------|
| LS01 | Coecum           | Normal     | MLH1     | F   | 56  | UM         |
| LS01 | Coecum           | Carcinoma  | MLH1     | F   | 56  | [M]        |
| LS02 | Transverse colon | Normal     | MLH1     | F   | 58  | UM         |
| LS02 | Transverse colon | Carcinoma  | MLH1     | F   | 58  | [M]        |
| LS03 | Colon            | Normal     | MSH2     | -   | 53  | UM         |
| LS03 | Colon            | Carcinoma  | MSH2     | -   | 53  | [M]        |
| LS04 | Colon            | Normal     | MSH2     | -   | 67  | UM         |
| LS04 | Colon            | Carcinoma  | MSH2     | -   | 67  | [M]        |
| LS05 | Colon            | Normal     | MLH1     | -   | 40  | UM         |
| LS05 | Colon            | Carcinoma  | MLH1     | -   | 40  | [M]        |
| LS06 | Ascending colon  | Normal     | MLH1     | -   | 31  | UM         |
| LS06 | Ascending colon  | Carcinoma  | MLH1     | -   | 31  | [M]        |
| LS07 | Ascending colon  | Normal     | MLH1     | -   | 56  | UM         |
| LS07 | Ascending colon  | Carcinoma  | MLH1     | -   | 56  | [M]        |
| LS08 | Colon            | Normal     | MSH2     | F   | 48  | UM         |
| LS08 | Colon            | Carcinoma  | MSH2     | F   | 48  | [M]        |
| LS09 | Transverse colon | Normal     | MSH2     | -   | 51  | UM         |
| LS09 | Transverse colon | Carcinoma  | MSH2     | -   | 51  | [M]        |
| LS10 | Colon            | Normal     | MSH6     | -   | 44  | UM         |
| LS10 | Colon            | Carcinoma  | MSH6     | -   | 44  | [M]        |
| LS11 | Colon            | Normal     | MLH1     | -   | 82  | UM         |
| LS11 | Colon            | Carcinoma  | MLH1     | -   | 82  | [M]        |
| LS12 | Ascending colon  | Normal     | MSH2     | -   | 46  | UM         |
| LS12 | Ascending colon  | Carcinoma  | MSH2     | -   | 46  | [M]        |
| LS13 | Transverse colon | Normal     | MLH1     | -   | 66  | UM         |
| LS13 | Transverse colon | Carcinoma  | MLH1     | -   | 66  | [M]        |
| LS13 | Transverse colon | Carcinoma  | MLH1     | -   | 66  | [M]        |
| LS14 | Rectosigmoid     | Normal     | MSH6     | M   | 62  | UM         |
| LS14 | Rectosigmoid     | Carcinoma  | MSH6     | M   | 62  | UM         |
| LS15 | Rectosigmoid     | Normal     | MSH2     | F   | 26  | UM         |
| LS15 | Rectosigmoid     | Carcinoma  | MSH2     | F   | 26  | [M]        |
| LS16 | Colon            | Normal     | MSH2     | F   | 61  | UM         |
| LS16 | Colon            | Carcinoma  | MSH2     | F   | 61  | [M]        |
| LS17 | Colon            | Normal     | MSH2     | M   | 36  | UM         |
| LS17 | Colon            | Carcinoma  | MSH2     | M   | 36  | [M]        |
| LS18 | Colon            | Normal     | MSH6     | F   | 48  | UM         |
| LS18 | Colon            | Carcinoma  | MSH6     | F   | 48  | [M]        |
| LS19 | Colon            | Normal     | MSH2     | F   | 58  | UM         |
| LS19 | Colon            | Carcinoma  | MSH2     | F   | 58  | UM         |
| LS20 | Descending colon | Normal     | MLH1     | M   | 46  | UM         |
| LS20 | Descending colon | Carcinoma  | MLH1     | M   | 46  | [M]        |
| LS20 | Descending colon | Carcinoma2 | MLH1     | M   | 46  | [M]        |
| LS21 | Ascending colon  | Normal     | MLH1     | M   | 28  | UM         |
| LS21 | Ascending colon  | Carcinoma  | MLH1     | M   | 28  | [M]        |
| LS22 | Ascending colon  | Normal     | MLH1     | M   | 48  | pM         |
| LS22 | Ascending colon  | Carcinoma2 | MLH1     | M   | 48  | [M]        |
| LS22 | Ascending colon  | Carcinoma  | MLH1     | M   | 48  | [M]        |
| LS23 | Rectum           | Normal     | MSH2     | -   | 31  | UM         |
| LS23 | Rectum           | Carcinoma  | MSH2     | -   | 31  | [M]        |
| LS24 | Colon            | Normal     | MSH6     | F   | 50  | UM         |
| LS24 | Colon            | Carcinoma  | MSH6     | F   | 50  | [M]        |
| LS25 | -                | Normal     | MSH6     | -   | -   | UM         |
| LS25 | -                | Carcinoma  | MSH6     | -   | -   | UM         |
| LS26 | Rectum           | Normal     | MSH6     | -   | 74  | UM         |
| LS26 | Rectum           | Carcinoma  | MSH6     | -   | 74  | [M]        |
| LS27 | Colon            | Normal     | MSH6     | -   | 72  | UM         |
| LS27 | Colon            | Carcinoma  | MSH6     | -   | 72  | [M]        |
| LS27 | Colon            | Carcinoma  | MSH6     | -   | 72  | [M]        |
| LS28 | Ascending colon  | Normal     | MSH6     | -   | 66  | UM         |
| LS28 | Ascending colon  | Carcinoma  | MSH6     | -   | 66  | pM         |
| LS29 | Colon            | Normal     | MSH2     | -   | -   | UM         |
| LS29 | Colon            | Carcinoma  | MSH2     | -   | -   | [M]        |
| LS30 | Colon            | Normal     | MSH2     | -   | -   | UM         |
| LS30 | Colon            | Carcinoma  | MSH2     | -   | -   | [M]        |
| LS31 | Rectosigmoid     | Carcinoma  | MSH2     | -   | 53  | [M]        |
| LS32 | Rectosigmoid     | Carcinoma  | MSH6     | -   | 51  | [M]        |
| LS33 | Colon            | Carcinoma  | MSH6     | M   | 70  | [M]        |
| LS34 | Coecum           | Carcinoma  | MSH6     | -   | 74  | [M]        |
| LS35 | Rectum           | Carcinoma  | MSH6     | -   | 57  | [M]        |
| LS36 | Coecum           | Carcinoma  | MSH6     | F   | 51  | UM         |
| LS37 | Colon            | Carcinoma  | MSH6     | F   | 78  | [M]        |
| LS37 | Colon            | Carcinoma  | MSH6     | F   | 78  | [M]        |
| LS38 | Colon            | Carcinoma  | MSH6_uv  | F   | 45  | [M]        |

EHJvRoon\_Methylation of a CTCF-binding site in PTPRG\_Supplementary table 2

|                    |                  |           |         |   |    |     |      |
|--------------------|------------------|-----------|---------|---|----|-----|------|
| LS39               | Ascending colon  | Carcinoma | MSH2    | M | 38 | [M] |      |
| LS40               | Rectum           | Carcinoma | MSH6    | M | 56 | UM  |      |
| LS41               | Colon            | Carcinoma | MSH2    | M | 37 | [M] |      |
| LS42               | Ascending colon  | Carcinoma | MSH6    | F | 59 | [M] |      |
| LS43               | Rectum           | Carcinoma | MSH6    | M | 37 | pM  |      |
| LS44               | Ascending colon  | Carcinoma | MSH6    | F | 46 | [M] |      |
| LS44               | Ascending colon  | Carcinoma | MSH6    | - | 46 | [M] |      |
| LS45               | Colon            | Carcinoma | MSH6    | - | 29 | [M] |      |
| LS46               | Rectosigmoid     | Carcinoma | MSH2    | - | 45 | [M] |      |
| LS47               | Colon            | Carcinoma | MSH6    | - | 62 | [M] |      |
| LS48               | -                | Carcinoma | MSH2    | - | -  | [M] |      |
| LS49               | Ascending colon  | Carcinoma | MSH6    | - | 68 | [M] |      |
| LS50               | Transverse colon | Carcinoma | MLH1    | - | 39 | [M] |      |
| LS51               | Rectosigmoid     | Carcinoma | MSH6    | F | 47 | [M] |      |
| LS51               | Colon            | Carcinoma | MSH6    | F | 47 | [M] |      |
| LS52               | Colon            | Carcinoma | MSH6    | - | -  | [M] |      |
| LS53               | Rectum           | Carcinoma | MSH6    | - | -  | [M] |      |
| LS54               | Colon            | Carcinoma | MSH6_uv | - | -  | pM  |      |
| LS55               | Colon            | Carcinoma | MSH2    | - | 28 | [M] |      |
| LS55               | Colon            | Carcinoma | MSH2    | - | 28 | [M] |      |
| LS56               | Colon            | Normal    | MLH1    | - | -  | UM  |      |
| LS57               | Colon            | Normal    | MLH1    | - | 57 | [M] |      |
| LS58               | Colon            | Normal    | MSH6    | - | -  | UM  |      |
| LS59               | Colon            | Normal    | MSH2    | - | 38 | UM  |      |
| LS60               | Colon            | Normal    | MLH1    | - | -  | UM  |      |
| LS61               | Colon            | Normal    | MSH2    | - | 53 | UM  |      |
| LS62               | Colon            | Normal    | -       | F | 50 | UM  |      |
| LS63               | Colon            | Normal    | MSH6    | F | 55 | UM  |      |
| LS64               | Colon            | Normal    | MSH6    | F | 55 | UM  |      |
| LS65               | Colon            | Normal    | MLH1    | - | -  | UM  |      |
| LS66               | Colon            | Normal    | MLH1    | - | -  | UM  |      |
| LS67               | Colon            | Normal    | MLH1    | - | -  | UM  |      |
| LS68               | Colon            | Normal    | MLH1    | - | 46 | [M] |      |
| LS69               | Colon            | Normal    | MSH6    | - | -  | UM  |      |
| LS70               | Colon            | Normal    | MSH2    | M | 38 | UM  |      |
| LS71               | Colon            | Normal    | MSH2    | - | -  | UM  |      |
| LS72               | Colon            | Normal    | MSH2    | - | 47 | UM  |      |
| LS73               | Colon            | Normal    | -       | - | -  | UM  |      |
| LS74               | Colon            | Normal    | -       | - | 45 | UM  |      |
| LS75               | Colon            | Normal    | MSH2    | - | -  | UM  |      |
| LS76               | Colon            | Normal    | MLH1    | - | 62 | UM  |      |
| LS77               | Colon            | Normal    | MSH2    | - | 48 | UM  |      |
| LS78               | Colon            | Normal    | MSH2    | M | 36 | UM  |      |
| LS79               | Colon            | Normal    | MLH1    | - | 70 | UM  |      |
| LS80               | Colon            | Normal    | MSH6    | - | 63 | UM  |      |
| LS81               | Colon            | Normal    | MLH1    | - | 50 | UM  |      |
| LS82               | Colon            | Normal    | MSH6    | - | 46 | UM  |      |
| LS83               | Colon            | Normal    | MLH1    | - | 48 | UM  |      |
| LS84               | Colon            | Normal    | MLH1    | - | 52 | UM  |      |
| LS85               | Colon            | Normal    | MSH2    | - | 54 | UM  |      |
| LS86               | Colon            | Normal    | MSH2    | - | -  | UM  |      |
| LS87               | Colon            | Normal    | MLH1    | - | 57 | UM  |      |
| LS88               | Colon            | Normal    | MSH2    | - | 43 | UM  |      |
| LS89               | Colon            | Normal    | MSH2    | - | 48 | UM  |      |
| LS90               | Colon            | Normal    | -       | F | 36 | UM  |      |
| Left sided         |                  |           |         |   |    |     | 14   |
| Right sided        |                  |           |         |   |    |     | 20   |
| Colon, unspecified |                  |           |         |   |    |     | 29   |
| Nor                |                  |           |         |   |    |     | 65   |
| Ca                 |                  |           |         |   |    |     | 63   |
| MLH1 mutation      |                  |           |         |   |    |     | 14   |
| MSH2 mutation      |                  |           |         |   |    |     | 19   |
| MSH6 mutation      |                  |           |         |   |    |     | 30   |
| Male               |                  |           |         |   |    |     | 12   |
| Female             |                  |           |         |   |    |     | 16   |
| NA                 |                  |           |         |   |    |     | 35   |
| Average age        |                  |           |         |   |    |     | 51.4 |
| SD                 |                  |           |         |   |    |     | 13.1 |

M: Male UM: Unmethylated (Methylation ratio  $\leq 0.22$  in MS-MLPA)  
 F: Female pM: Partially methylated (Methylation ratio between 0.22 and 0.39 in MS-MLPA)  
 Nor: Normal [M]: Methylated (Methylation ratio  $>0.39$  in MS-MLPA)  
 Ca: Carcinoma  
 SD: Standard deviation  
 -: Data not available
