# Supplementary material
Source: PubMed Central journal article supplement (PMC3061992)
Supplement: ejhg2010187x5.pdf [file ejhg2010187x5.pdf]

| Name               | 5' - Left primer - 3'      | 5' - Right primer - 3'                        | Region amplified (UCSC assembly: March 2006) |
|--------------------|----------------------------|-----------------------------------------------|----------------------------------------------|
| PTPRG Bisulfite    | GATTTAAAATGGGATTGTTAGGGAAT | CTTACTCCAAAACCTACTACTCCCTCT                   | chr3: 61525133 – 61525357                    |
| PTPRG_RealTime     | CACCAGTTCGGTGCTCCATT       | GCCCCAACGTAGCCTTCTG                           |                                              |
| PTPRG_ChIP         | TGGACCATTTTCGTCTTCTCA      | AACCAAACCGCCCTCTTC                            | chr3: 61525175-61525312                      |
| Neg_ChIP           | GAGTTGGGAGAGCTGTCAGG       | CAGCTGCAGGGGAAACTATC                          | chr10: 5531673-5531817                       |
| Pos_ChIP           | TGAAATGGGTGAAGAGATGGA      | TTACGCTTGTTAGGGCCTTG                          | chr3: 69438321-69438450                      |
| MS-MPLA PTPRG      | GAAAGGACAGTGGTGGGAGGC      | GCAGGGAAGAGGGCGGTT                            | chr3: 61525269-61525308                      |
| MS-MPLA PosControl | GGCCATGGAATCTGCTGAACAAA    | GGAACAAGGTTTATCAAGGGATGTCACAACCGTGTGGAAGTTGCG | chr13: 31851549 – 31851617                   |
